# Supplementary material
Source: PubMed Central journal article supplement (PMC11105659)
Supplement: 18_2018_2779_MOESM1_ESM.pdf [file 18_2018_2779_MOESM1_ESM.pdf]

# Degradation of the mitochondrial complex I assembly factor TMEM126B under chronic hypoxia

## Supplementary Figures

Dominik C. Fuhrmann<sup>1</sup>, Ilka Wittig<sup>2,4</sup>, Stefan Dröse<sup>3</sup>, Tobias Schmid<sup>1</sup>, Nathalie Dehne<sup>1</sup>, Bernhard Brüne<sup>1,\*</sup>

<sup>1</sup>Institute of Biochemistry I, Faculty of Medicine, Goethe-University Frankfurt, Germany

<sup>2</sup>Functional Proteomics, SFB 815 Core Unit, Goethe-University Frankfurt, Germany

<sup>3</sup>Department of Anesthesiology, Intensive-Care Medicine and Pain Therapy, Faculty of Medicine, Goethe-University Frankfurt, Germany

<sup>4</sup>German Center for Cardiovascular Research (DZHK), Partner site Rhein Main, Frankfurt, Germany

\*Address correspondence to: [b.bruene@biochem.uni-frankfurt.de](mailto:b.bruene@biochem.uni-frankfurt.de)

Bernhard Brüne  
Goethe-University Frankfurt  
Faculty of Medicine  
Institute of Biochemistry I  
Theodor-Stern-Kai 7  
60590 Frankfurt  
Germany

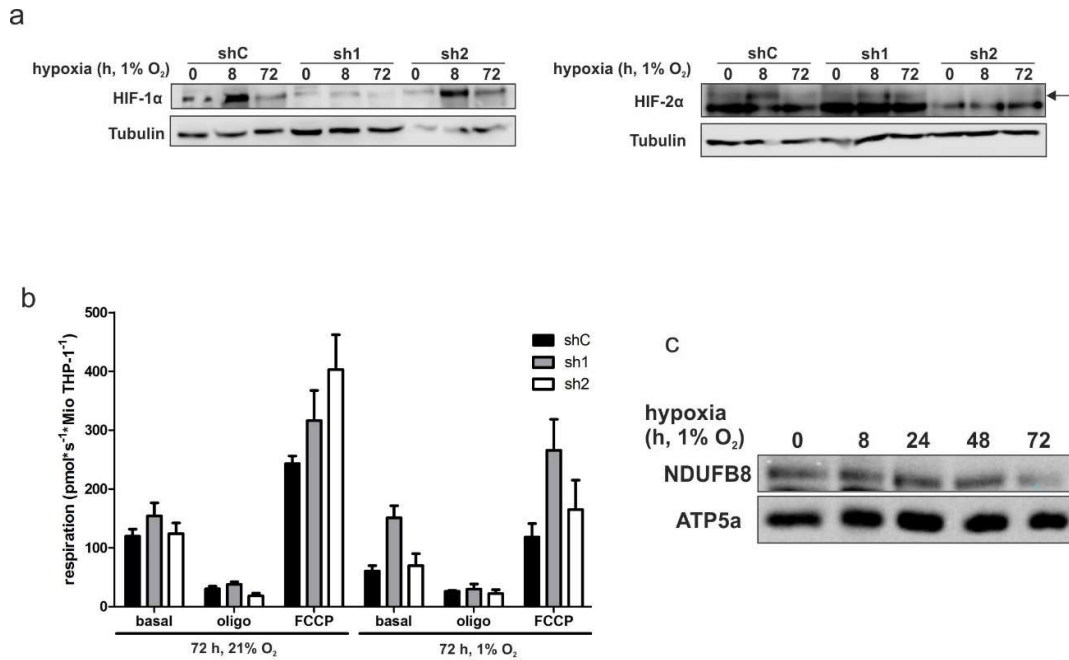

**Fig.S1: Validation of the HIF-knockdown and respiration of sh2 cells**

(A) THP-1 control (shC), HIF-1 $\alpha$  knockdown (sh1), and HIF-2 $\alpha$  knockdown (sh2) cells were incubated for indicated time points under hypoxia and expression of HIF-1 $\alpha$  and HIF-2 $\alpha$  was analyzed by Western blotting. (B) Respiration was measured after culturing THP-1 control (shC), HIF-1 $\alpha$  knockdown (sh1), or HIF-2 $\alpha$  knockdown (sh2) cells for 72 h in either 21% or 1% O<sub>2</sub>. Oxygen consumption with oligomycin (oligo, 2  $\mu$ g/ml) was compared to the maximal uncoupled respiratory capacity was estimated by subsequently adding carbonyl cyanide-4 (trifluoromethoxy) phenylhydrazone (FCCP, 1  $\mu$ M). All data are shown as mean values  $\pm$  SEM. (C) THP-1 cells were time-dependently incubated under hypoxia. Complex I and V were quantified using BNE and expression of NDUFB8 and ATP5a.

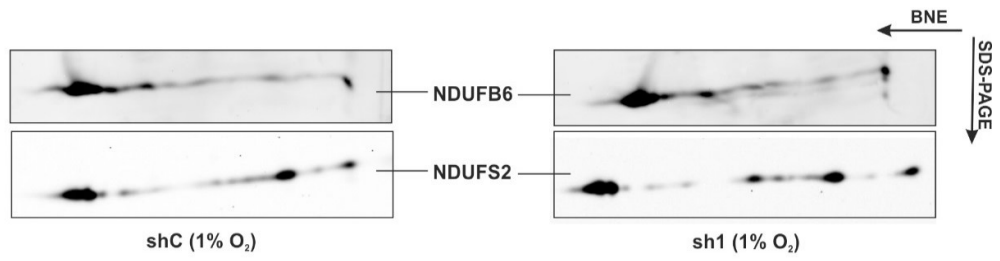

**Fig.S2: 2D-BNE of NDUF6 and NDUF2**

Validation of complexome profiling by 2D-BNE coupled with Western analysis for NDUF6 and NDUF2.

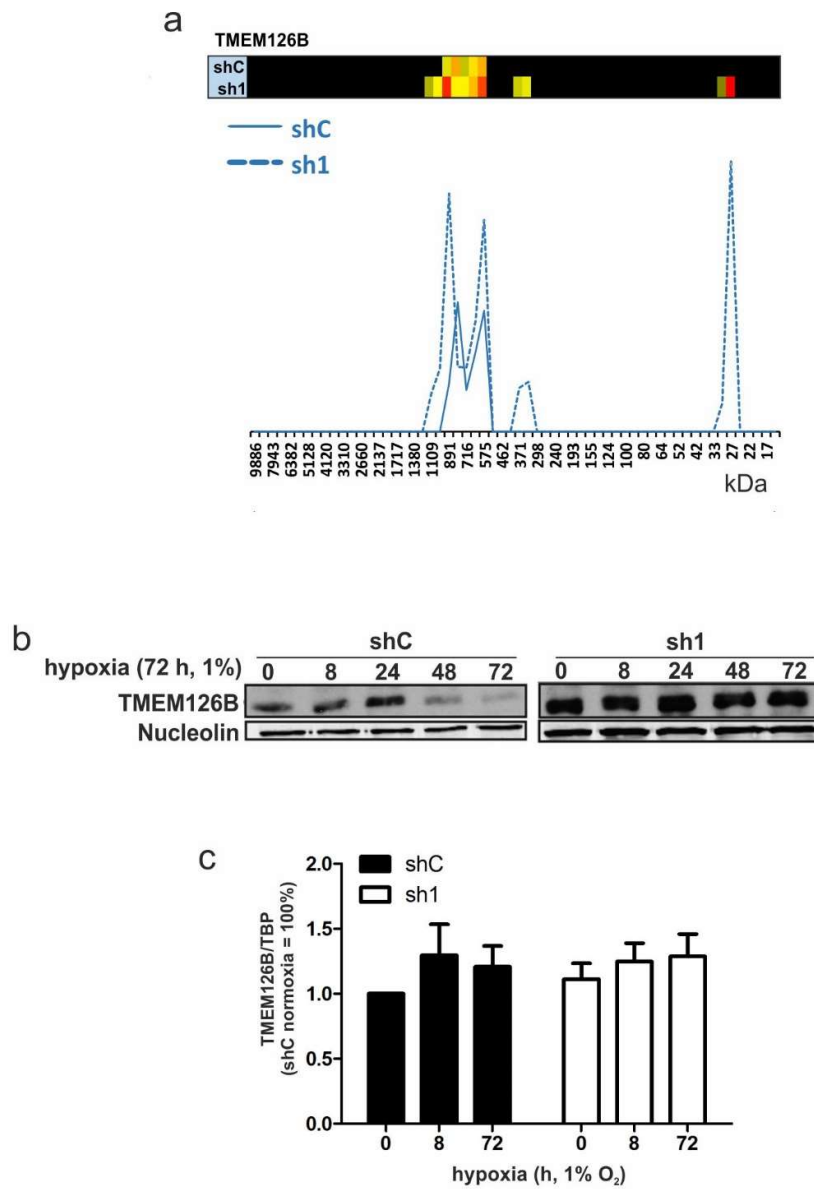

**Fig.S3: Profile and time course of TMEM126B**

(a) Complexome profile of TMEM126B in THP-1 control (shC) and HIF-1 $\alpha$  knockdown cells (sh1). (b) Western analysis of TMEM126B in control (shC) and HIF-1 $\alpha$  knockdown cells (sh1). (c) qPCR analysis of TMEM126B in THP-1 cells (n=5).

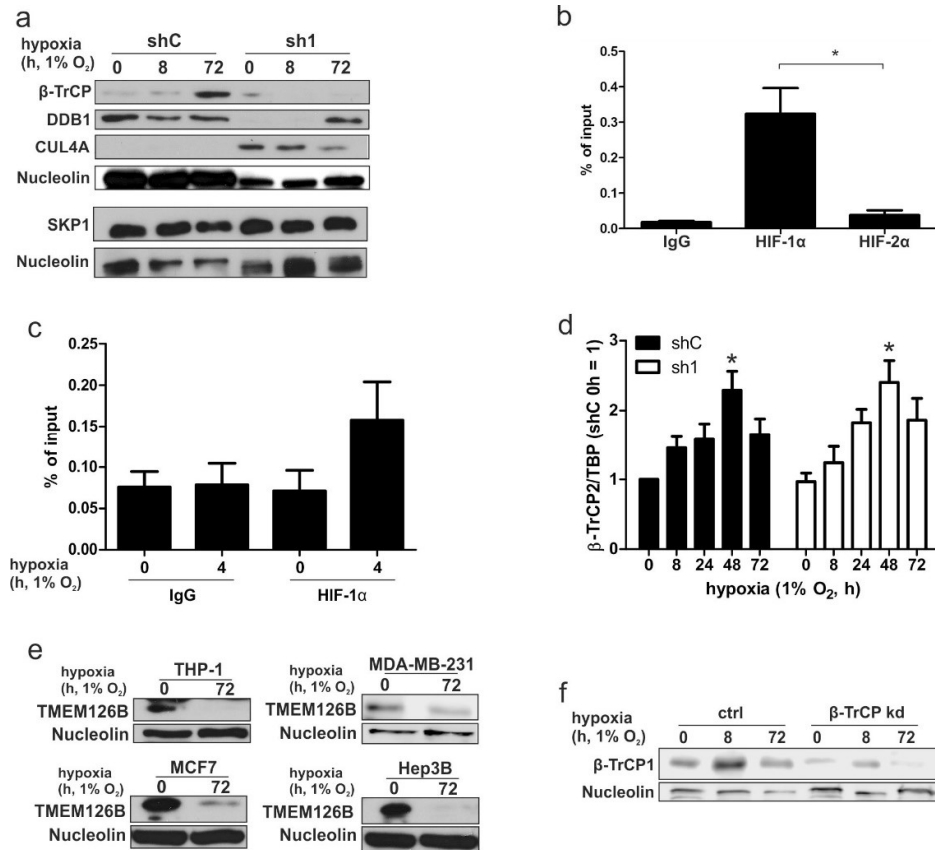

**Fig.S4: E3 Ubiquitin ligase complex regulation under hypoxia and verification of hypoxic TMEM126B regulation**

(a) Western analysis of the E3 ubiquitin ligase complex members F-box/WD repeat-containing protein 1A ( $\beta$ -TrCP1), DNA damage-binding protein 1 (DDB1), cullin4A (CUL4A), and S-phase kinase-associated protein 1 (SKP1) in THP-1 control (shC) and HIF-1 $\alpha$  knockdown cells (sh1). (b) ChIP analysis for HIF-1 $\alpha$  and HIF-2 $\alpha$  binding to the  $\beta$ -TrCP gene in primary human macrophages incubated for 4 h under hypoxia. (c) ChIP analysis for HIF-1 $\alpha$  binding to the  $\beta$ -TrCP gene in MDA-MB-231 cells incubated for 4 h under hypoxia. (d) mRNA analysis of  $\beta$ -TrCP2 in shC and sh1 cells. (e) Western analysis of TMEM126B in THP-1, MDA-MB-231, MCF7, and Hep3B cells. (f) Western analysis of  $\beta$ -TrCP in MDA-MB-231 control and IPTG-inducible  $\beta$ -TrCP knockdown cells.

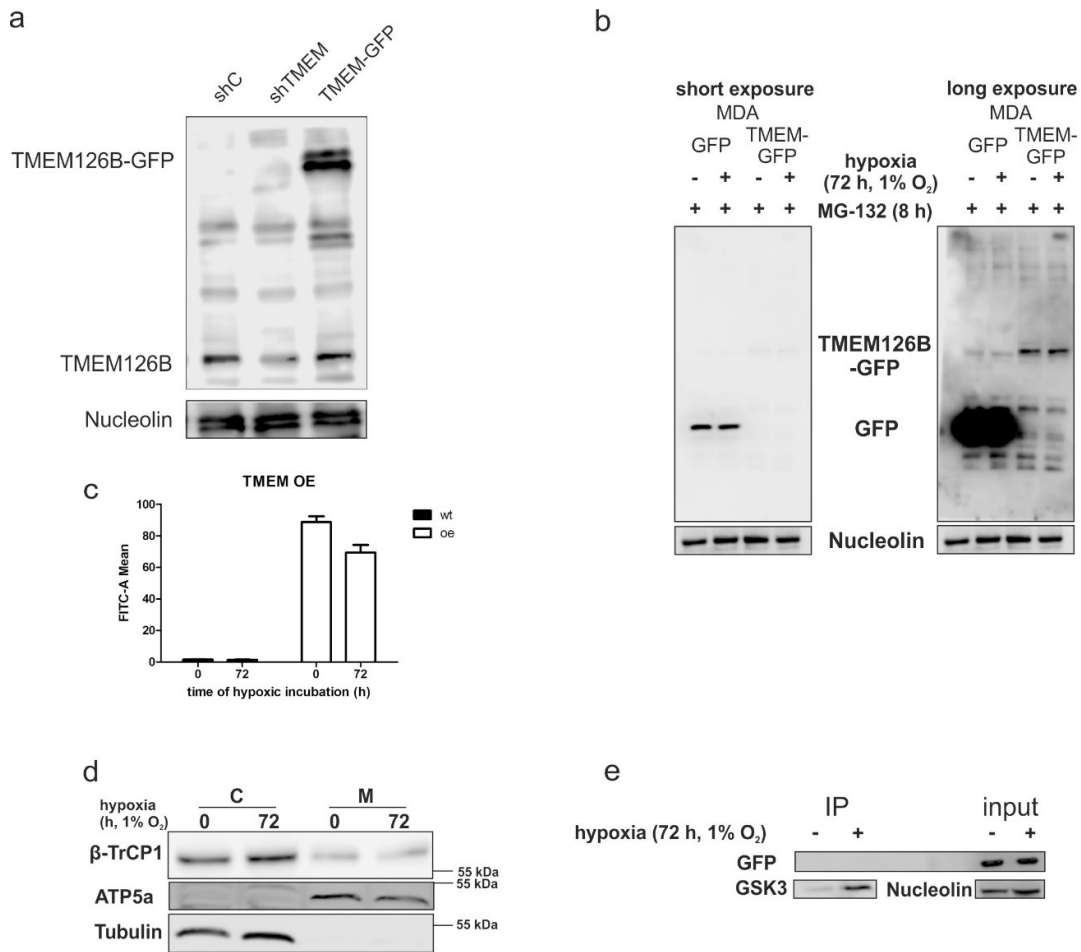

**Fig.S5: Validation of TMEM126B overexpression and IP**

(a) Western analysis of control (shC), TMEM126B knockdown (shTMEM) and TMEM126B-GFP overexpressing MDA-MB-231 cells stained for TMEM126B. (b) Western analysis of control (shC) and TMEM126B-GFP overexpressing MDA-MB-231 cells stained for GFP. (c) FACS analysis of TMEM-GFP expressing cells compared to wildtype (wt) in normoxia or chronic hypoxia depicted as FITC-A mean fluorescence. (d) Western analysis of  $\beta$ -TrCP1 in mitochondrial (M) and cytosolic (C) fractions of MDA-MB-231 lysate. (e) Western analysis of GFP after IP using an Akt substrate antibody. GSK3 serves as a positive control for the IP and Nucleolin as a loading control for the input.
