# Supplementary material
Source: PubMed Central journal article supplement (PMC11105659)

Online Resource 2: Complexome profiling of subunits from complex I, III, IV and complex I assembly factors

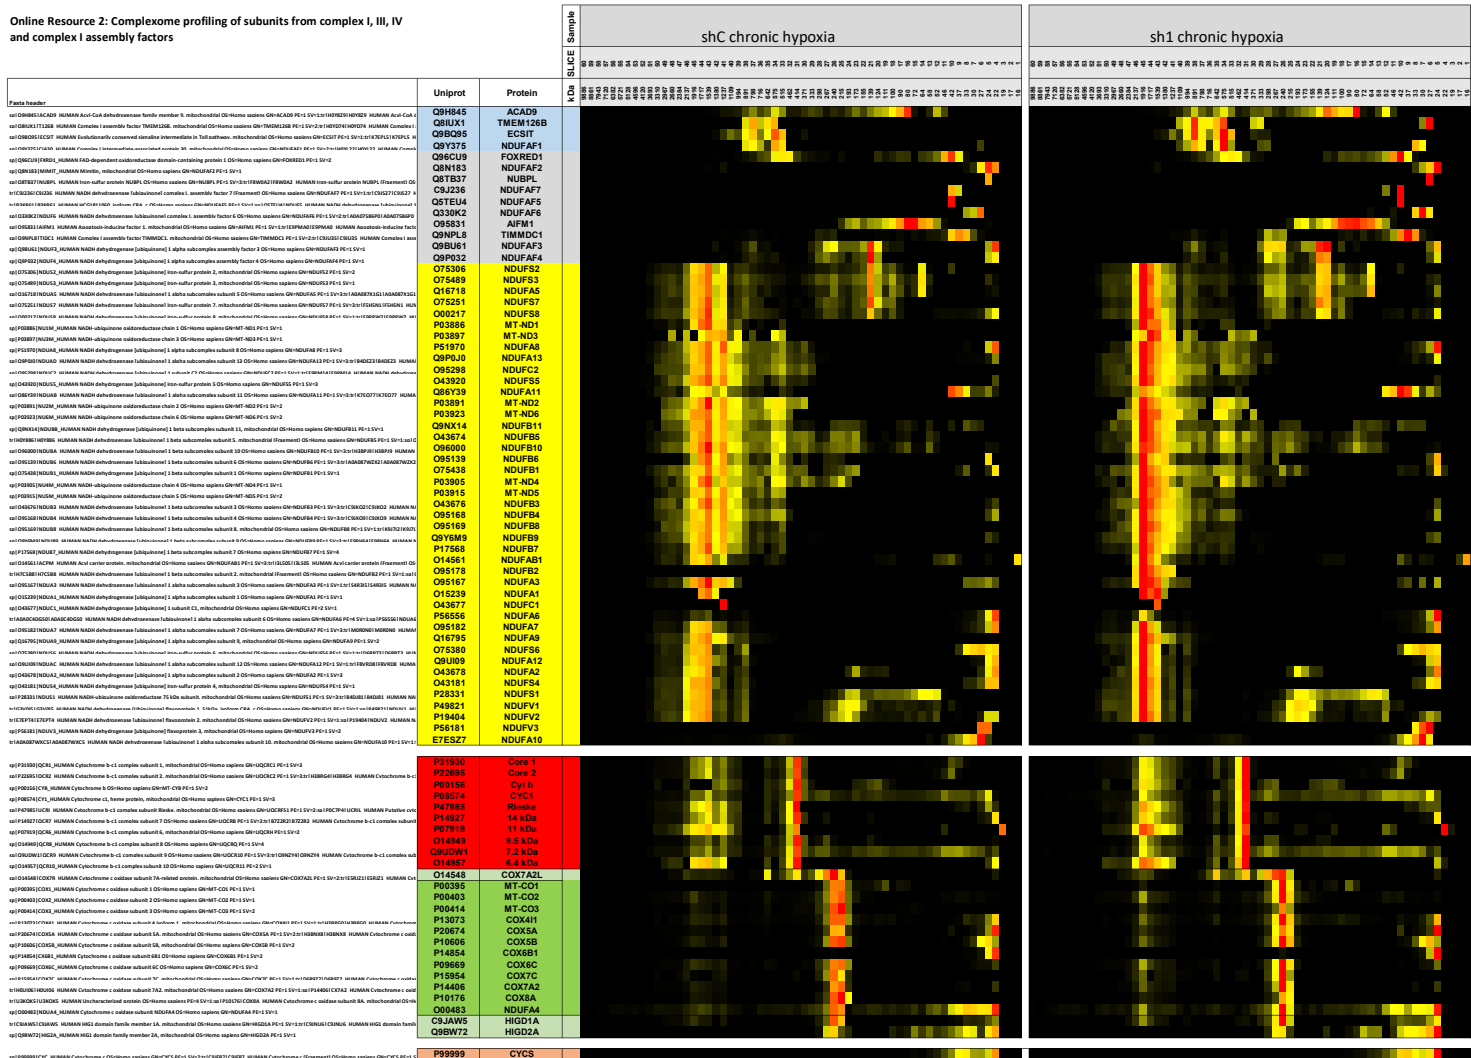

Supplement: 18_2018_2779_MOESM2_ESM.pdf [file 18_2018_2779_MOESM2_ESM.pdf]
